# Supplementary material for: Pathogenic LRRK2 requires secondary factors to induce cellular toxicity
Source: Oxford University Press journal article supplement (doi:10.1042/bsr20202225), 2020-09-25
Supplement: bsr-2020-2225_supp.pdf [file bsr-2020-2225_supp.pdf]

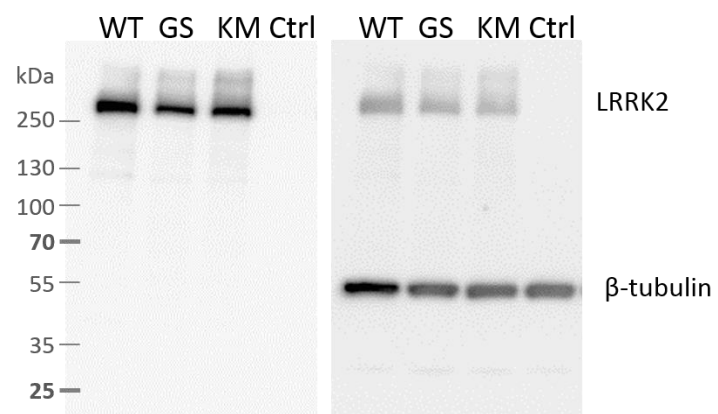

**Figure S1 LRRK2 overexpression in stable selected SH-SY5Y cell lines.** Immunoblotting showing overexpression of 3flag-LRRK2 WT, G2019S or K1906M or eGFP as a control. The full length blot with LRRK2 detection is shown on the left, subsequent  $\beta$ -tubulin detection on the right.

**a**

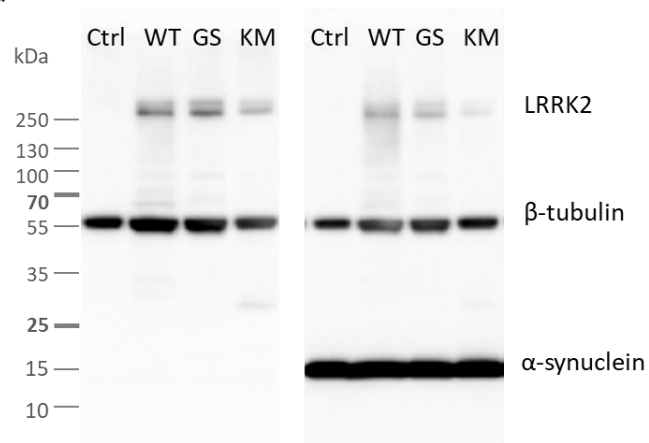

**b**

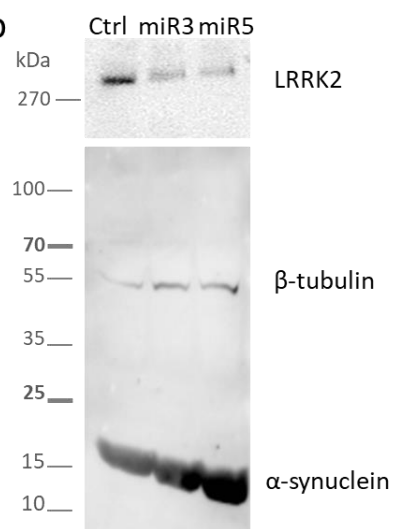

**Figure S2 Alpha-synuclein overexpression combined with LRRK2 overexpression or knock down in stable double selected SH-SY5Y cell lines. a.** Immunoblotting showing overexpression of 3flag-LRRK2 WT, G2019S or K1906M or eGFP as a control. The full length blot with LRRK2 and  $\beta$ -tubulin detection is shown on the left, subsequent  $\alpha$ -synuclein detection on the right. **b.** LRRK2 knock down using two different miRNA-based short hairpin sequences. A short hairpin sequence against firefly luciferase is included as negative control.
